# Supplementary material for: Crystallization kinetics of semiconducting poly(2,5-bis(3-alkylthiophen-2-yl)-thieno-[3,2-b]thiophene) (PBTTT) from its different liquid phases
Source: Royal Society of Chemistry journal article supplement (doi:10.1039/d3tc03850e), 2024-01-01
Supplement: d3tc03850e1.pdf [file d3tc03850e1.pdf]

# Supporting information for Crystallization Kinetics of semiconducting Poly(2,5-bis(3-alkylthiophen-2-yl)- thieno-[3,2-b]thiophene) (PBTTT) from its Different Liquid Phases

*Valentina Pirela<sup>§</sup>, Alejandro J. Müller<sup>\*,§,‡</sup>, Jaime Martín<sup>\*,§,‡,||</sup>*

§ POLYMAT and Department of Polymers and Advanced Materials: Physics, Chemistry, and Technology, Faculty of Chemistry, University of the Basque Country UPV/EHU, Paseo Manuel de Lardizabal 3, 20018, Donostia-San Sebastián, (Spain).

‡ IKERBASQUE, Basque Foundation for Science, Plaza Euskadi 5, 48009, Bilbao (Spain).

|| Universidade da Coruña, Campus Industrial de Ferrol, CITENI, Esteiro, 15471 Ferrol, Spain.

\*Corresponding authors:

\*Jaime Martín: [jaime.martin.perez@udc.es](mailto:jaime.martin.perez@udc.es)

\*Alejandro J. Müller: [alejandrojesus.muller@ehu.es](mailto:alejandrojesus.muller@ehu.es)

## EXPERIMENTAL SECTION

### Materials

Poly(2,5-bis(3-alkylthiophen-2-yl)-thieno-[3,2-b]thiophene), PBTTT- $C_{12}$  ( $M_w = 65,000$ ;  $\bar{D} = 2.5$ ), thin-films were deposited from 20  $\mu$ L from 20 mg/mL solutions in chlorobenzene at 90 °C after 1h of stirring at 1000 rpm during 60 s.

### Fast Scanning Chip Calorimetry (FSC)

FSC Experiments were performed on a Mettler-Toledo Flash DSC 2+ device. The equipment is connected to a Huber TC-100 intracooler, permitting scans of up to 40,000 °C/s. The MultiSTAR UFS1 (24×24×0.6 mm<sup>3</sup>) chip sensors were conditioned and corrected prior to use according to the Flash DSC 2+ specifications. Measurements were carried out under a nitrogen atmosphere with a constant 80 mL/min flow rate. The STARe software was used to analyze the data. The thermal protocols essentially consisted in recording heat flow rates during the heating of the sample crystallized at a given temperature for different times.

### Atomic Force Microscopy (AFM)

A dimension ICON with a Nanoscope V controller (Bruker) AFM was used to image the samples. A Peak-Force Tapping mode using ScanAsyst-Air tips by Bruker (nominal tip radius of 2 nm, nominal frequency of 70 kHz, nominal spring constant = 0.4 N/m) was used to obtain the images. A PBTTT thin-film was deposited from a 20 mg/mL solution on the back side of the chip with a glucose cover on the reference cell, which was removed after deposition with water. The sample was heated above the smectic-to-isotropic transition ( $T_{LC}$ ), and after melting it was rapidly cooled (at 4000 °C/s) to the crystallization temperature ( $T_c$ ). Subsequently, the sample was kept at  $T_c$  for 48h, it was rapidly cooled to a temperature below the glassy state,

$T_g$ , and rapidly heated to room temperature and then measured by AFM.

### **Polarized Light Optical Microscope (PLOM)**

Experiments were performed on a polarized light optical microscope, Olympus BX51 (Olympus, Tokyo, Japan), with an Olympus SC50 digital camera coupled to the microscope. The PLOM was equipped with a Linkam-15 TP-91 hot stage Linkam, Tadworth, U.K, connected to a liquid nitrogen cooling system that was used to observe the morphology of the sample. Samples were prepared by heating a small fraction of the polymer powder from 25 °C to a  $T_{LC} + 30$  °C to at 20 °C/min

### **Grazing Incidence Wide Angle X-Ray Scattering (GIWAXS)**

GIWAXS measurements were performed at the BL11 NCD-SWEET at ALBA Synchrotron Radiation Facility (Barcelona, Spain). The incident X-ray beam energy was set to 12.4 eV using a channel cut Si (1 1 1) monochromator. 2D GIWAXS patterns were corrected as a function of the components of the scattering vector ( $q$ ). 2D GIWAXS patterns were corrected as a function of the components of the scattering vector. The angle of incidence  $\alpha_i$  was set between 0.1° and 0.2° to ensure surface sensitivity. Data are expressed as a function of the scattering vector, which was calibrated using  $\text{Cr}_2\text{O}_3$ , obtaining a sample-to-detector distance of 145.6 mm. The scattering patterns were recorded using a Rayonix LX255-HS area detector, which consists of a pixel array of  $1920 \times 5760$  pixels (H  $\times$  V) with a pixel size of  $44 \times 44 \mu\text{m}^2$ . All the measurements were performed under  $\text{N}_2$  atmosphere to minimize the damage of the films. PBTTT thin-films were deposited from a 20 mg/mL solution on to Si wafers by spin-coating the sample. Acquisition time was 0.5 s.

In the in-situ GIWAXS experiment, GIWAXS patterns were collected while heating up the samples from 30 to 300 °C at 20 °C/min under  $\text{N}_2$  atmosphere.

## Results

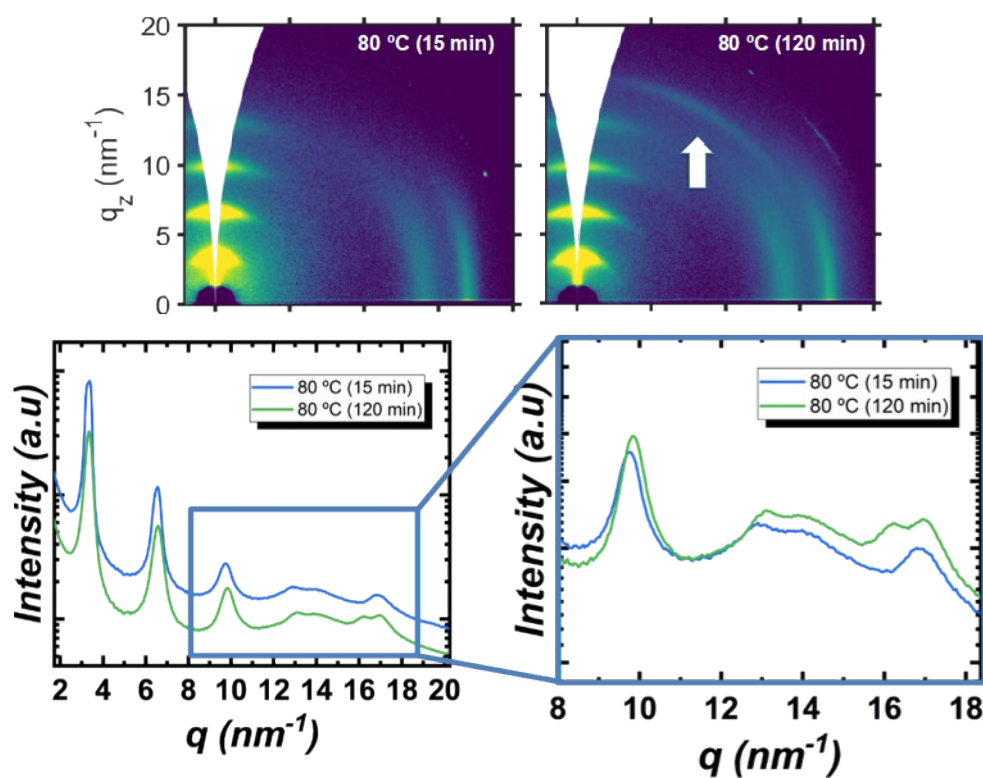

**Figure S1.** GIWAXS patterns for PBT TT films annealed at 80 °C for 15 min and 120 min).

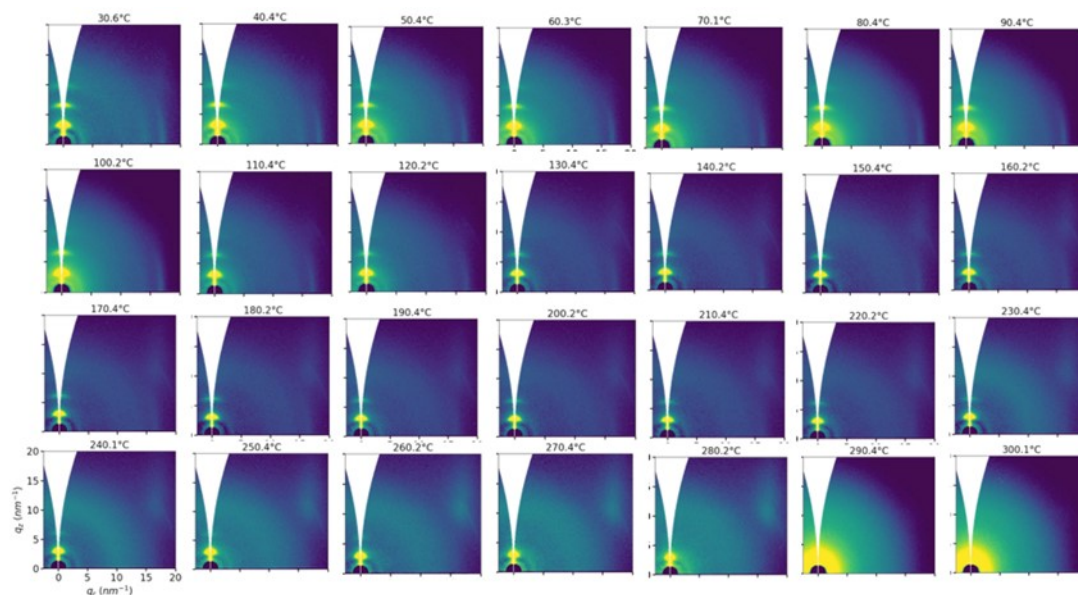

**Figure S2.** *In situ* GIWAXS patterns for PBT TT films acquired during heating from 30 °C to 300 °C

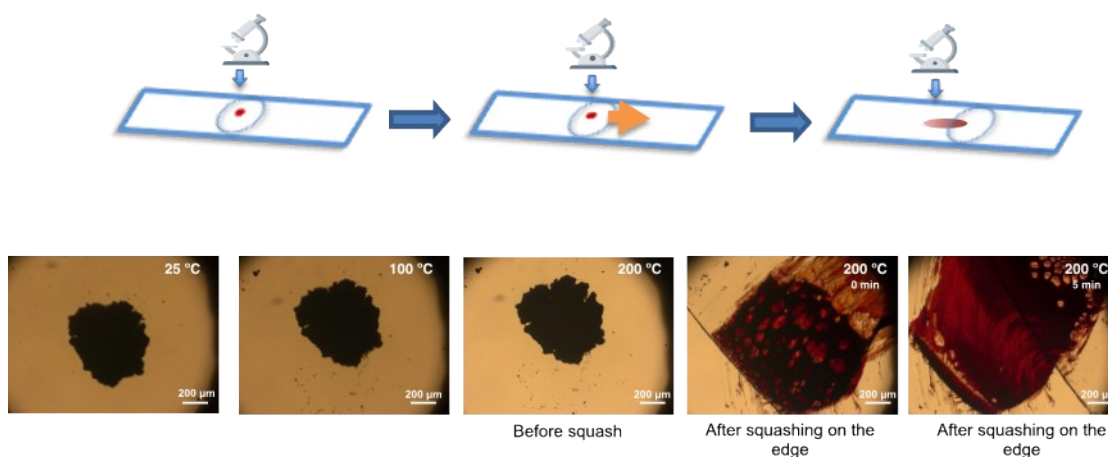

**Figure S3.** Optical microscopy images of a small piece of PBT TT acquired at the indicated temperatures. The images on the right hand side clearly show that PBT TT is a liquid at 200 °C.

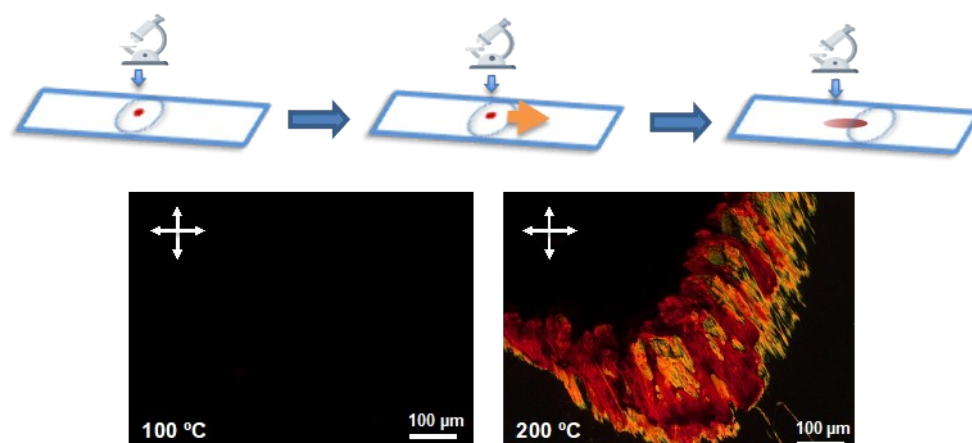

**Figure S4.** Optical microscopy images of a small piece of PBT TT acquired at the temperatures indicated. The images on the right hand side clearly show that PBT TT is a birefringent liquid at 200 °C.

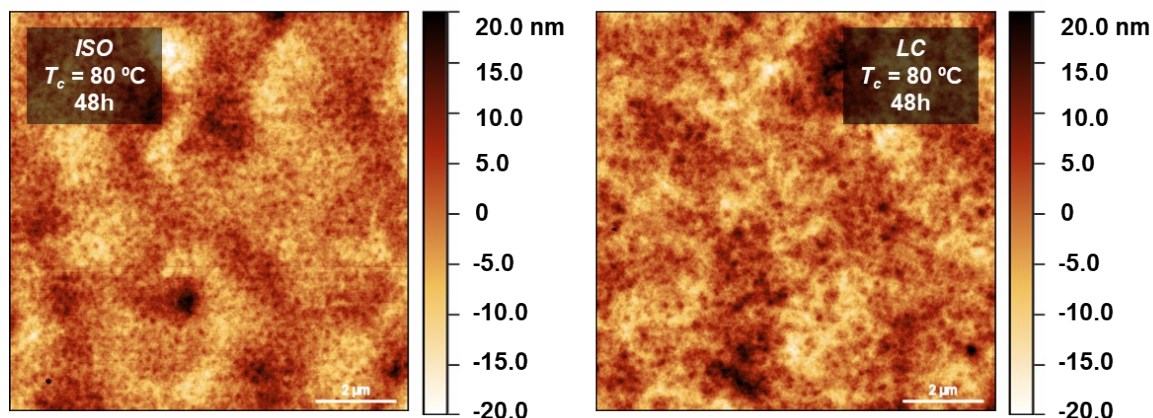

**Figure S5.** A) AFM-height images of PBTTT crystallized at  $T_c = 80\text{ }^{\circ}\text{C}$  to form a ribbon phase after 48h (ISO state) . B) AFM-height images of PBTTT crystallized at  $T_c = 80\text{ }^{\circ}\text{C}$  to form a terraced phase after 48h (LC state).

Atomic Force Microscopy (AFM) characterization of the thin films were conducted after applying the thermal protocols described above. **Figure S5A** and **Figure S5B** confirm the different solid-state morphologies of resulting films, the ribbon phase in **Figure S5A** and the terraced phase **Figure S5B** (we must emphasize here the difficulty of acquiring high-quality AFM images on thin film cast directly onto the FSC chip-sensors employed for FSC).

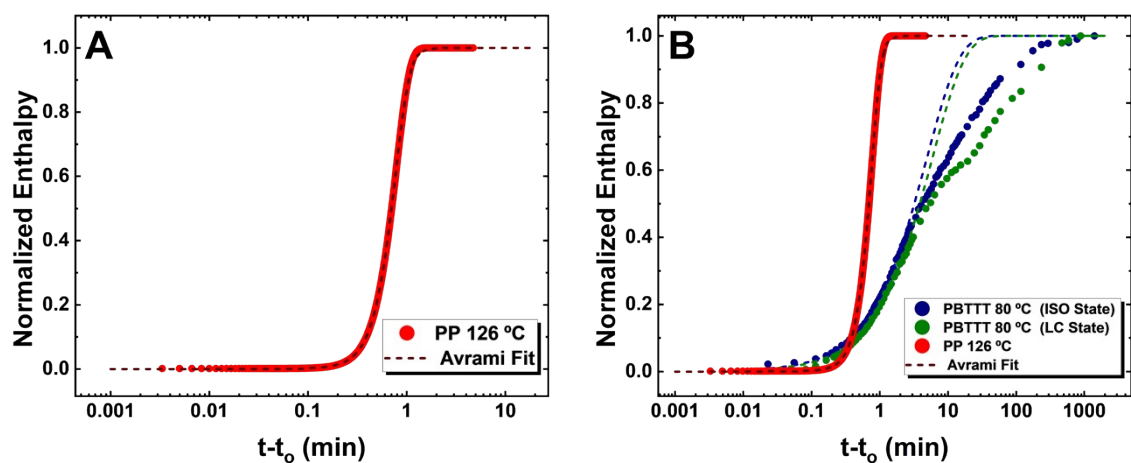

**Figure S6.** Crystallization kinetics A) Example of Polypropylene (PP) normative crystallization kinetics. B) Comparison of PP kinetics with the data obtained of PBT TT at  $T_c = 80\text{ }^{\circ}\text{C}$ .

**Scheme S1.** Diagram of crystallization from an ISO state and a LC state

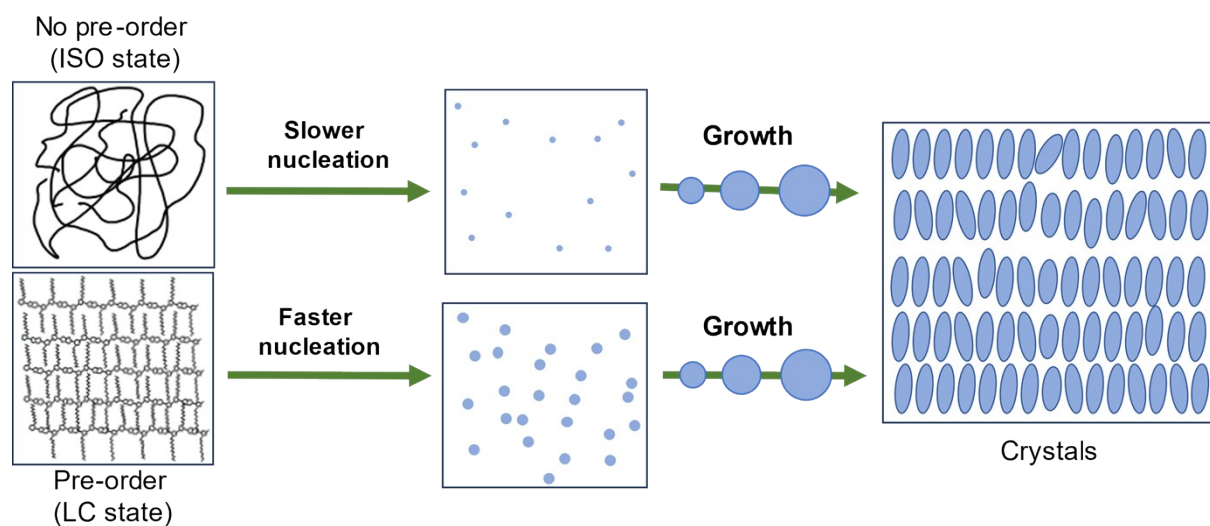

**Table S1.** Values obtained from applying the Avrami theory to the experimental data

| $T_c$ (°C) | State | $1/t_{20\%exp}$ (min <sup>-1</sup> ) | $k^{1/n}$ (min <sup>-1</sup> ) | Avrami index ( $n$ ) |
|------------|-------|--------------------------------------|--------------------------------|----------------------|
| 60         | ISO   | 0.23                                 | 0.06                           | 1.2                  |
|            | LC    | 0.54                                 | 0.1                            | 0.89                 |
| 65         | ISO   | 0.66                                 | 0.23                           | 1.4                  |
|            | LC    | 0.86                                 | 0.24                           | 1.1                  |
| 70         | ISO   | 0.26                                 | 0.06                           | 0.97                 |
|            | LC    | 0.82                                 | 0.17                           | 0.89                 |
| 75         | ISO   | 0.32                                 | 0.03                           | 0.65                 |
|            | LC    | 0.59                                 | 0.13                           | 0.96                 |
| 80         | ISO   | 1.10                                 | 0.20                           | 0.89                 |
|            | LC    | 0.93                                 | 0.23                           | 1.05                 |
| 85         | ISO   | 0.44                                 | 0.09                           | 0.88                 |
|            | LC    | 0.35                                 | 0.07                           | 0.89                 |
| 90         | ISO   | 0.41                                 | 0.08                           | 0.90                 |
|            | LC    | 0.740                                | 0.11                           | 0.88                 |
